# Supplementary material for: A meta-analysis of Th1 and Th2 cytokine profiles differentiating tuberculous from malignant pleural effusion
Source: PubMed Central journal article supplement (PMC8854582; doi:10.1038/s41598-022-06685-8), 2022-02-17
Supplement: 41598_2022_6685_MOESM1_ESM.pdf [file 41598_2022_6685_MOESM1_ESM.pdf]

Supplementary Fig. S1

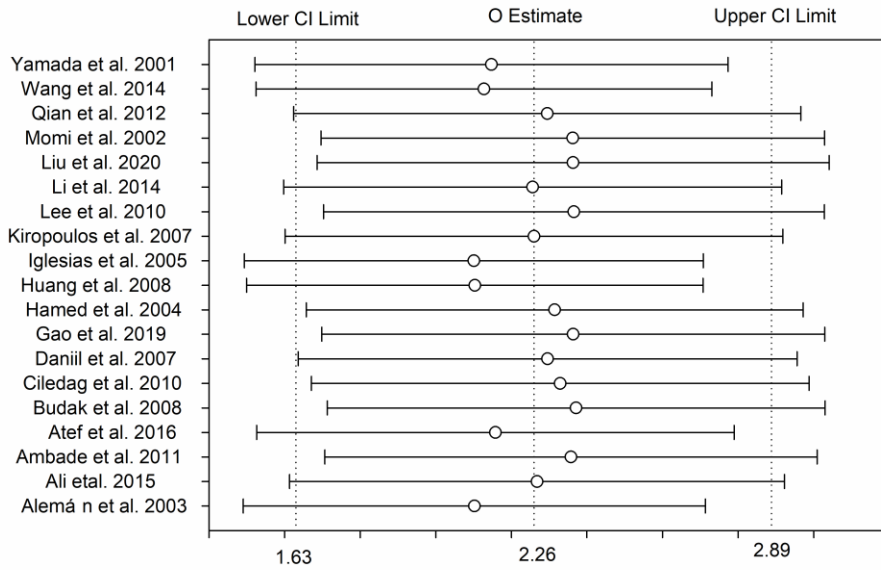

Sensitivity analysis of the all 19 studies on TNF- $\alpha$  included in the meta-analysis. The circle indicates the total combined effect SMD, the two ends of every broken line represent the respective 95% confidence interval.

Fig. S2a

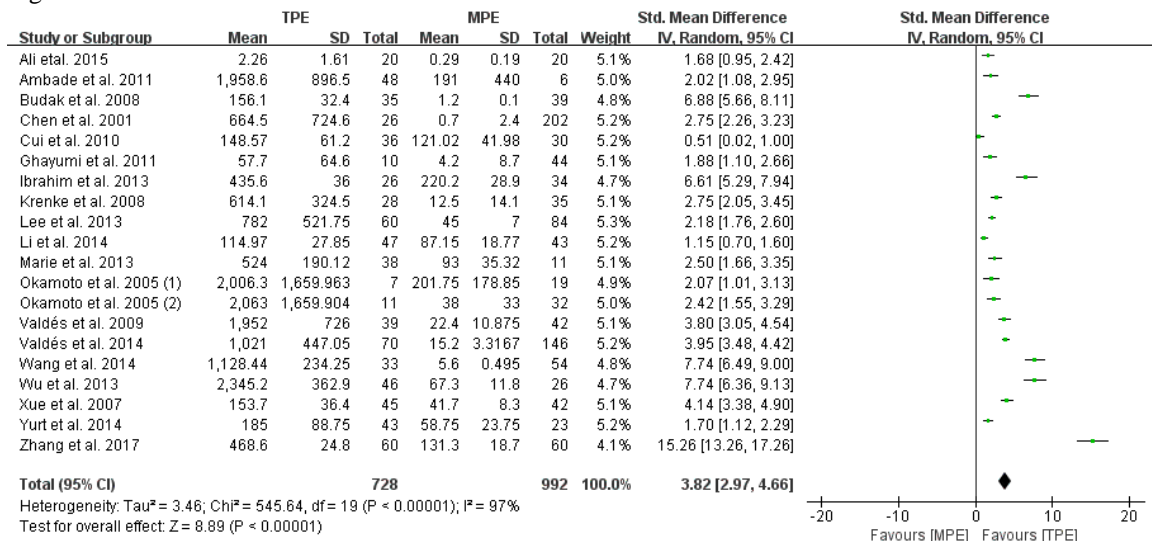

Forest plot for remaining 20 studies comparing IFN- $\gamma$  levels in tuberculous pleural effusions and malignant effusions.

Supplementary Fig. S2b

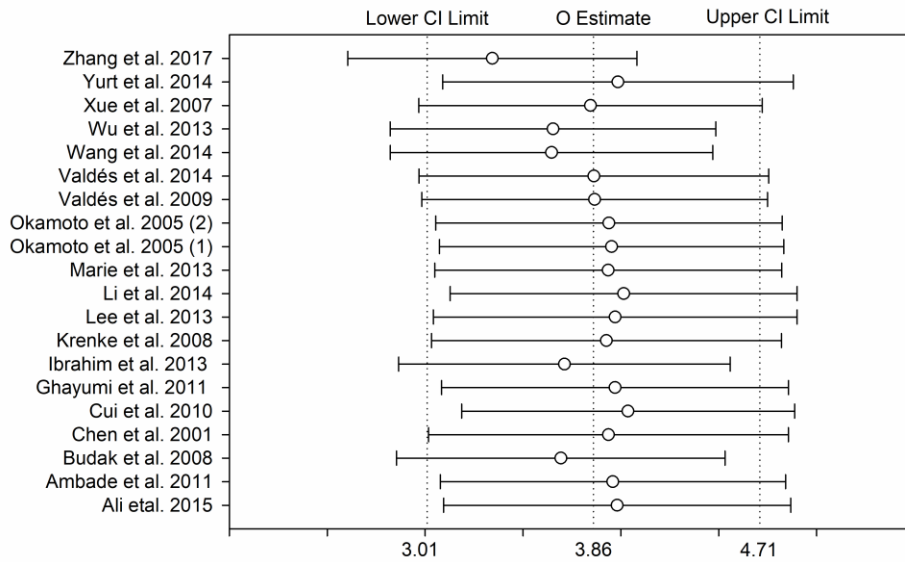

Sensitivity analysis of the all 20 studies on IFN- $\gamma$  included in the meta-analysis.

Supplementary Fig. 2c

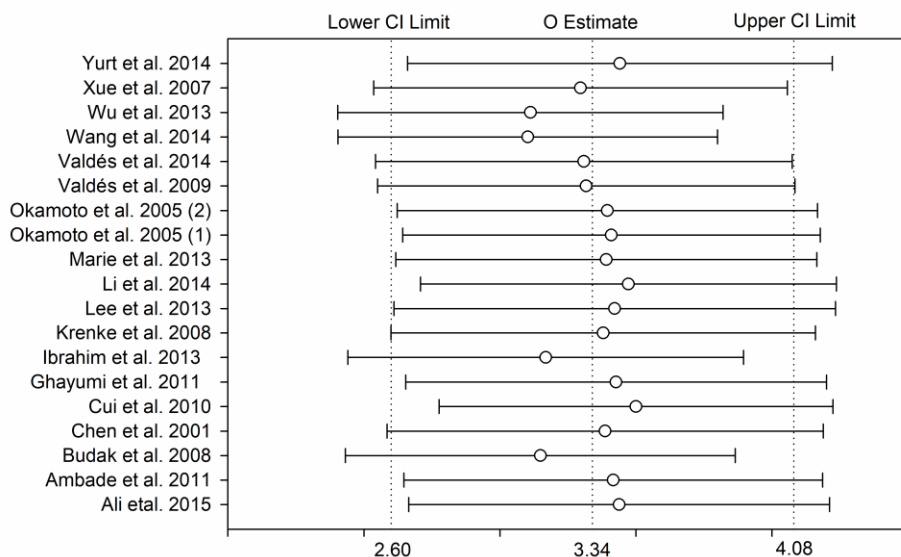

Sensitivity analysis of the remaining 19 studies on IFN- $\gamma$  included in the meta-analysis.

Fig. S3a

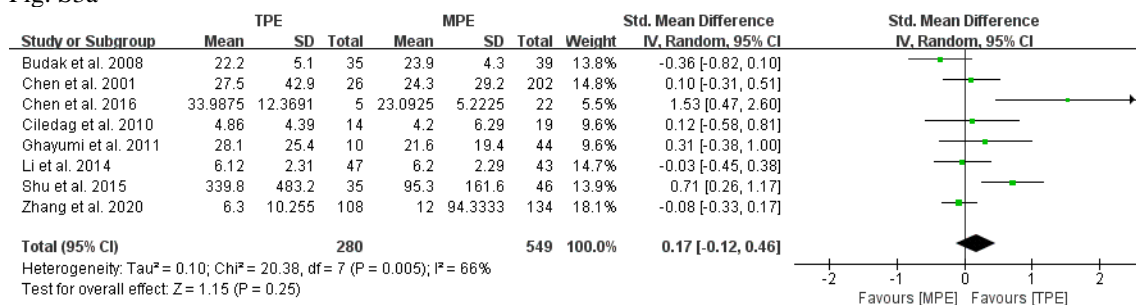

Forest plot for combined total 8 studies comparing IL-10 levels in tuberculous pleural effusions and malignant effusions.

Fig. S3b

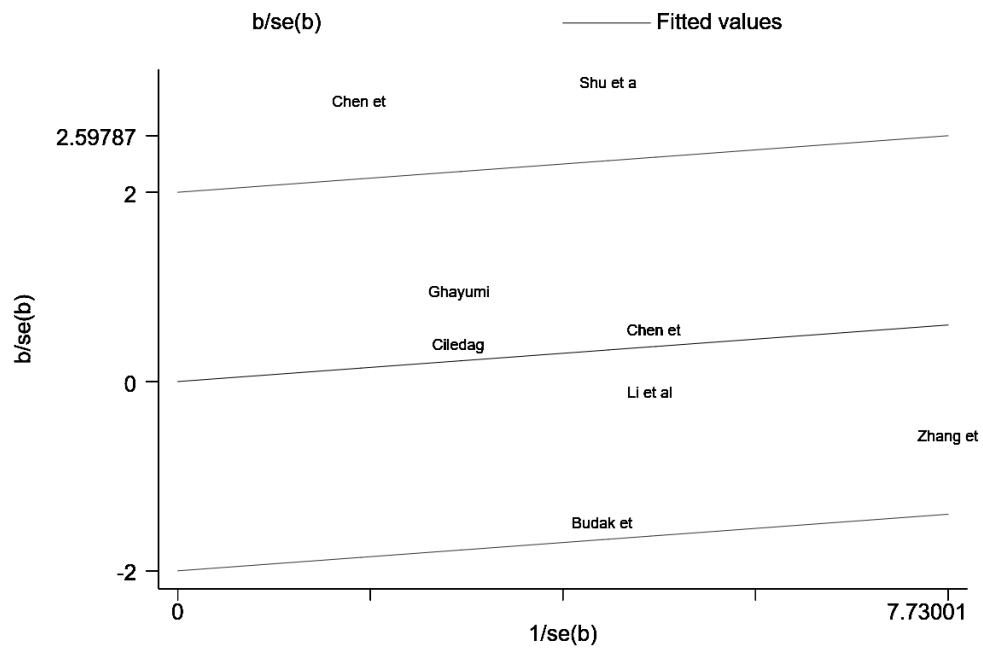

Galbraith radial plot for the heterogeneity across studies on IL-10.

Fig. S4a

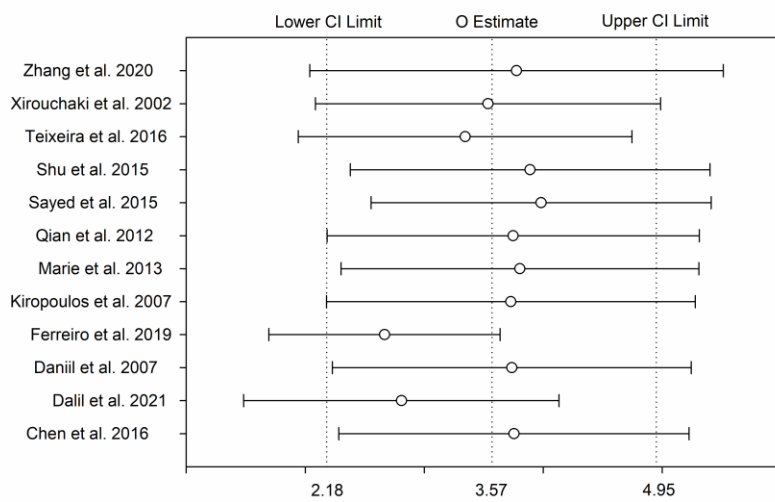

Sensitivity analysis of the all 12 studies on IL-6 included in the meta-analysis.

Fig. S4b

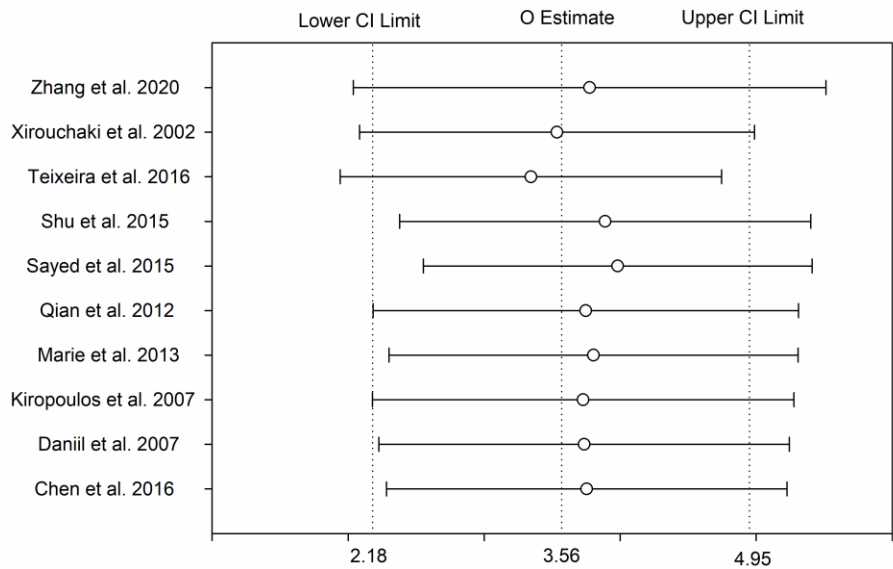

Sensitivity analysis of the remaining 10 studies on IL-6 included in the meta-analysis.

Fig. S4c

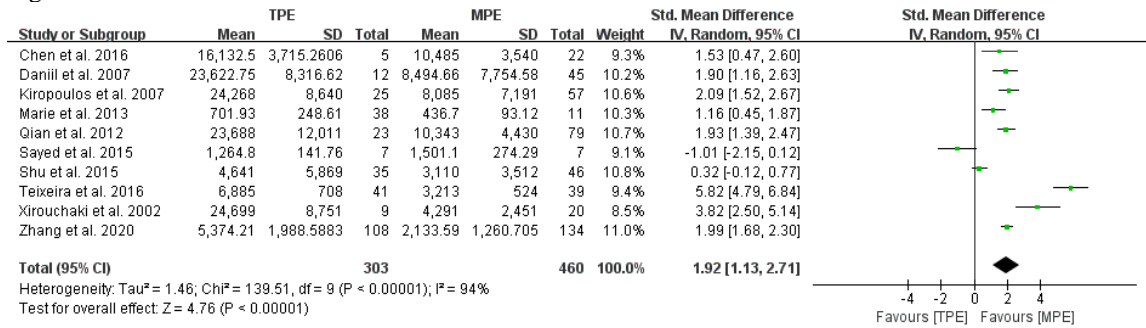

Forest plot for remaining 10 studies comparing IL-6 levels in tuberculous pleural effusions and malignant effusions.
