# Supplementary material for: A meta-analysis of Th1 and Th2 cytokine profiles differentiating tuberculous from malignant pleural effusion
Source: PubMed Central journal article supplement (PMC8854582; doi:10.1038/s41598-022-06685-8), 2022-02-17
Supplement: 41598_2022_6685_MOESM2_ESM.pdf [file 41598_2022_6685_MOESM2_ESM.pdf]

## 1. Search strategy:

Pubmed: (((("Pleural Effusion, Malignant"[Mesh]) OR ((((((Effusion, Malignant Pleural[Title/Abstract])) OR (Effusions, Malignant Pleural[Title/Abstract])) OR (Malignant Pleural Effusion[Title/Abstract])) OR (Malignant Pleural Effusions[Title/Abstract])) OR (Pleural Effusions, Malignant[Title/Abstract])))) OR (((("Pleural Effusion"[Mesh]) OR (((Effusion, Pleural[Title/Abstract]) OR (Effusions, Pleural[Title/Abstract])) OR (Pleural Effusions[Title/Abstract])))) AND (tuberculous))) AND (((((((("Interleukin-2"[Mesh]) OR (((((((((((((((Interleukin 2[Title/Abstract]) OR (IL-2[Title/Abstract]) OR (IL2[Title/Abstract]) OR (TCGF[Title/Abstract])) OR (Interleukine 2[Title/Abstract])) OR (Lymphocyte Mitogenic Factor[Title/Abstract])) OR (Mitogenic Factor, Lymphocyte[Title/Abstract])) OR (T-Cell Growth Factor[Title/Abstract])) OR (T Cell Growth Factor[Title/Abstract])) OR (T-Cell Stimulating Factor[Title/Abstract])) OR (T Cell Stimulating Factor[Title/Abstract])) OR (Thymocyte Stimulating Factor[Title/Abstract])) OR (Interleukin II[Title/Abstract])) OR (Ro 23 6019[Title/Abstract])) OR (RU 49637[Title/Abstract])) OR (RU-49637[Title/Abstract])) OR (RU49637[Title/Abstract])))) OR (((("Interferon-gamma"[Mesh]) OR ((((((gamma-Interferon[Title/Abstract]) OR (Interferon, Immune[Title/Abstract])) OR (Immune Interferon[Title/Abstract])) OR (Type II Interferon[Title/Abstract])) OR (Interferon, Type II[Title/Abstract])) OR (Interferon Type II[Title/Abstract])) OR (Interferon, gamma[Title/Abstract])))) OR (((("Tumor Necrosis Factor-alpha"[Mesh]) OR (((((((((((Tumor Necrosis Factor alpha[Title/Abstract]) OR (Cachectin[Title/Abstract])) OR (Cachectin-Tumor Necrosis Factor[Title/Abstract])) OR (Cachectin Tumor Necrosis Factor[Title/Abstract])) OR (Tumor Necrosis Factor Ligand Superfamily Member 2[Title/Abstract])) OR (Tumor Necrosis Factor[Title/Abstract])) OR (TNF Superfamily, Member 2[Title/Abstract])) OR (TNFalpha[Title/Abstract])) OR (TNF-alpha[Title/Abstract])))) OR (((("Interleukin-6"[Mesh]) OR (((((((((((((((((((Interleukin 6[Title/Abstract]) OR (IL6[Title/Abstract]) OR (B-Cell Stimulatory Factor 2[Title/Abstract])) OR (B-Cell Stimulatory Factor-2[Title/Abstract])) OR (Differentiation Factor-2, B-Cell[Title/Abstract])) OR (Differentiation Factor 2, B Cell[Title/Abstract])) OR (B-Cell Differentiation Factor-2[Title/Abstract])) OR (B Cell Differentiation Factor 2[Title/Abstract])) OR (BSF-2[Title/Abstract])) OR (Hybridoma Growth Factor[Title/Abstract])) OR (Growth Factor, Hybridoma[Title/Abstract])) OR (IFN-beta 2[Title/Abstract])) OR (Plasmacytoma Growth Factor[Title/Abstract])) OR (Growth Factor, Plasmacytoma[Title/Abstract])) OR (Hepatocyte-Stimulating Factor[Title/Abstract])) OR (Hepatocyte Stimulating Factor[Title/Abstract])) OR (MGI-2[Title/Abstract])) OR (Myeloid Differentiation-Inducing Protein[Title/Abstract])) OR (Differentiation-Inducing Protein, Myeloid[Title/Abstract])) OR (Myeloid Differentiation Inducing Protein[Title/Abstract])) OR (B-Cell Differentiation Factor[Title/Abstract])) OR (B Cell Differentiation Factor[Title/Abstract])) OR (Differentiation Factor, B-Cell[Title/Abstract])) OR (Differentiation Factor, B Cell[Title/Abstract])) OR (IL-6[Title/Abstract])) OR (Interferon beta-2[Title/Abstract])) OR (Interferon beta 2[Title/Abstract])) OR (beta-2, Interferon[Title/Abstract])) OR (B Cell Stimulatory Factor-2[Title/Abstract])) OR (B Cell Stimulatory Factor 2[Title/Abstract])))) OR (((((((((((((((((((Interleukin 4[Title/Abstract]) OR (B-Cell Growth Factor-1[Title/Abstract])) OR (B Cell Growth Factor 1[Title/Abstract])) OR (B-Cell Growth Factor-I[Title/Abstract])) OR (B Cell Growth Factor I[Title/Abstract])) OR (B-Cell Proliferating Factor[Title/Abstract])) OR (B Cell Proliferating Factor[Title/Abstract])) OR (B-Cell Stimulating Factor-1[Title/Abstract])) OR (B Cell Stimulating Factor 1[Title/Abstract])) OR (B-Cell Stimulatory Factor 1[Title/Abstract])) OR (B-Cell Stimulatory Factor-1[Title/Abstract])) OR (BCGF-1[Title/Abstract])) OR (Binetrakin[Title/Abstract])) OR (BSF-

1[Title/Abstract])) OR (IL-4[Title/Abstract])) OR (IL4[Title/Abstract])) OR (Mast Cell Growth Factor-2[Title/Abstract])) OR (Mast Cell Growth Factor 2[Title/Abstract])) OR (B Cell Stimulatory Factor-1[Title/Abstract])) OR (B Cell Stimulatory Factor 1[Title/Abstract])) OR ("Interleukin-5"[Mesh]) OR (((((((((((Interleukin 5[Title/Abstract]) OR (BCGF-II[Title/Abstract])) OR (Differentiation Factor, Eosinophil[Title/Abstract])) OR (T-Cell-Replacing Factor[Title/Abstract])) OR (T Cell Replacing Factor[Title/Abstract])) OR (IL-5[Title/Abstract])) OR (IL5[Title/Abstract])) OR (T-Cell Replacing Factor[Title/Abstract])) OR (Replacing Factor, T-Cell[Title/Abstract])) OR (B-Cell Growth Factor-II[Title/Abstract])) OR (B Cell Growth Factor II[Title/Abstract])) OR (Eosinophil Differentiation Factor[Title/Abstract]))) OR ("Interleukin-10"[Mesh]) OR (((Interleukin 10[Title/Abstract]) OR (IL10[Title/Abstract])) OR (IL-10[Title/Abstract])) OR (Cytokine Synthesis Inhibitory Factor[Title/Abstract]))) Filters: from 2000/1/1 - 3000/12/12

Embase

Session Results

.....

| No.  | Query Results                                                                                                                                                                                                                                                                                                                                                                                                 | Results    | Date        |
|------|---------------------------------------------------------------------------------------------------------------------------------------------------------------------------------------------------------------------------------------------------------------------------------------------------------------------------------------------------------------------------------------------------------------|------------|-------------|
| #34. | #32 AND #33                                                                                                                                                                                                                                                                                                                                                                                                   | 559        | 15 Mar 2021 |
| #33. | [2000-2021]/py                                                                                                                                                                                                                                                                                                                                                                                                | 24,234,152 | 15 Mar 2021 |
| #32. | #30 AND #31                                                                                                                                                                                                                                                                                                                                                                                                   | 685        | 15 Mar 2021 |
| #31. | #3 OR #8                                                                                                                                                                                                                                                                                                                                                                                                      | 8,223      | 15 Mar 2021 |
| #30. | #11 OR #14 OR #17 OR #20 OR #23 OR #26 OR #29                                                                                                                                                                                                                                                                                                                                                                 | 778,748    | 15 Mar 2021 |
| #29. | #27 OR #28                                                                                                                                                                                                                                                                                                                                                                                                    | 135,399    | 15 Mar 2021 |
| #28. | 'interleukin-10':ab,ti OR 'il10':ab,ti OR<br>'il-10':ab,ti OR 'cytokine synthesis inhibitory<br>factor':ab,ti                                                                                                                                                                                                                                                                                                 | 96,319     | 15 Mar 2021 |
| #27. | 'interleukin 10'/exp                                                                                                                                                                                                                                                                                                                                                                                          | 123,497    | 15 Mar 2021 |
| #26. | #24 OR #25                                                                                                                                                                                                                                                                                                                                                                                                    | 34,991     | 15 Mar 2021 |
| #25. | 'interleukin-5':ab,ti OR 'bcgf-ii':ab,ti OR<br>'differentiation factor, eosinophil':ab,ti OR<br>'t-cell-replacing factor':ab,ti OR 't cell<br>replacing factor':ab,ti OR 'il-5':ab,ti OR<br>'il5':ab,ti OR 't-cell replacing factor':ab,ti OR<br>'replacing factor, t-cell':ab,ti OR 'b-cell<br>growth factor-ii':ab,ti OR 'b cell growth factor<br>ii':ab,ti OR 'eosinophil differentiation<br>factor':ab,ti | 22,381     | 15 Mar 2021 |
| #24. | 'interleukin 5'/exp                                                                                                                                                                                                                                                                                                                                                                                           | 30,697     | 15 Mar 2021 |
| #23. | #21 OR #22                                                                                                                                                                                                                                                                                                                                                                                                    | 97,650     | 15 Mar 2021 |
| #22. | 'interleukin-4':ab,ti OR 'b-cell growth<br>factor-1':ab,ti OR 'b cell growth factor 1':ab,ti<br>OR 'b-cell growth factor-i':ab,ti OR 'b cell<br>growth factor i':ab,ti OR 'b-cell proliferating                                                                                                                                                                                                               | 69,176     | 15 Mar 2021 |

factor':ab,ti OR 'b cell proliferating  
 factor':ab,ti OR 'b-cell stimulating  
 factor-1':ab,ti OR 'b cell stimulating factor  
 1':ab,ti OR 'b-cell stimulatory factor 1':ab,ti  
 OR 'b-cell stimulatory factor-1':ab,ti OR  
 'bcgf-1':ab,ti OR 'binetrakin':ab,ti OR  
 'bsf-1':ab,ti OR 'il-4':ab,ti OR 'il4':ab,ti OR  
 'mast cell growth factor-2':ab,ti OR 'mast cell  
 growth factor 2':ab,ti OR 'b cell stimulatory  
 factor-1':ab,ti OR 'b cell stimulatory factor  
 1':ab,ti

#21. 'interleukin 4'/exp 85,117 15 Mar 2021  
 #20. #18 OR #19 288,356 15 Mar 2021

#19. 'interleukin-6':ab,ti OR 'il6':ab,ti OR 'b-cell  
 stimulatory factor 2':ab,ti OR 'b-cell  
 stimulatory factor-2':ab,ti OR 'differentiation  
 factor-2, b-cell':ab,ti OR 'differentiation  
 factor 2, b cell':ab,ti OR 'b-cell  
 differentiation factor-2':ab,ti OR 'b cell  
 differentiation factor 2':ab,ti OR 'bsf-2':ab,ti  
 OR 'hybridoma growth factor':ab,ti OR 'growth  
 factor, hybridoma':ab,ti OR 'ifn-beta 2':ab,ti OR  
 'plasmacytoma growth factor':ab,ti OR 'growth  
 factor, plasmacytoma':ab,ti OR  
 'hepatocyte-stimulating factor':ab,ti OR  
 'hepatocyte stimulating factor':ab,ti OR  
 'mgi-2':ab,ti OR 'myeloid  
 differentiation-inducing protein':ab,ti OR  
 'differentiation-inducing protein, myeloid':ab,ti  
 OR 'myeloid differentiation inducing  
 protein':ab,ti OR 'b-cell differentiation  
 factor':ab,ti OR 'b cell differentiation  
 factor':ab,ti OR 'differentiation factor,  
 b-cell':ab,ti OR 'differentiation factor, b  
 cell':ab,ti OR 'il-6':ab,ti OR 'interferon  
 beta-2':ab,ti OR 'interferon beta 2':ab,ti OR  
 'beta-2, interferon':ab,ti OR 'b cell stimulatory  
 factor-2':ab,ti OR 'b cell stimulatory factor  
 2':ab,ti

#18. 'interleukin 6'/exp 262,617 15 Mar 2021  
 #17. #15 OR #16 374,346 15 Mar 2021

#16. 'tumor necrosis factor alpha':ab,ti OR  
 'cachectin':ab,ti OR 'cachectin-tumor necrosis  
 factor':ab,ti OR 'cachectin tumor necrosis

|                                                                                                                                                                                                                                                                                                                                                                                                                                                                                                               |         |             |
|---------------------------------------------------------------------------------------------------------------------------------------------------------------------------------------------------------------------------------------------------------------------------------------------------------------------------------------------------------------------------------------------------------------------------------------------------------------------------------------------------------------|---------|-------------|
| factor':ab,ti OR 'tumor necrosis factor ligand<br>superfamily member 2':ab,ti OR 'tumor necrosis<br>factor':ab,ti OR 'tnf superfamily, member<br>2':ab,ti OR 'tnfalpa':ab,ti OR 'tnf-alpha':ab,ti                                                                                                                                                                                                                                                                                                             |         |             |
| #15. 'tumor necrosis factor'/exp                                                                                                                                                                                                                                                                                                                                                                                                                                                                              | 334,856 | 15 Mar 2021 |
| #14. #12 OR #13                                                                                                                                                                                                                                                                                                                                                                                                                                                                                               | 192,631 | 15 Mar 2021 |
| #13. 'gamma-interferon':ab,ti OR 'interferon,<br>immune':ab,ti OR 'immune interferon':ab,ti OR<br>'type ii interferon':ab,ti OR 'interferon, type<br>ii':ab,ti OR 'interferon type ii':ab,ti OR<br>'interferon, gamma':ab,ti                                                                                                                                                                                                                                                                                  | 30,725  | 15 Mar 2021 |
| #12. 'gamma interferon'/exp                                                                                                                                                                                                                                                                                                                                                                                                                                                                                   | 186,143 | 15 Mar 2021 |
| #11. #9 OR #10                                                                                                                                                                                                                                                                                                                                                                                                                                                                                                | 128,186 | 15 Mar 2021 |
| #10. 'interleukin-2':ab,ti OR 'il-2':ab,ti OR<br>'il2':ab,ti OR 'tcgf':ab,ti OR 'interleukine<br>2':ab,ti OR 'lymphocyte mitogenic factor':ab,ti<br>OR 'mitogenic factor, lymphocyte':ab,ti OR<br>'t-cell growth factor':ab,ti OR 't cell growth<br>factor':ab,ti OR 't-cell stimulating<br>factor':ab,ti OR 't cell stimulating<br>factor':ab,ti OR 'thymocyte stimulating<br>factor':ab,ti OR 'interleukin ii':ab,ti OR 'ro 23<br>6019':ab,ti OR 'ru 49637':ab,ti OR<br>'ru-49637':ab,ti OR 'ru49637':ab,ti | 92,825  | 15 Mar 2021 |
| #9. 'interleukin 2'/exp                                                                                                                                                                                                                                                                                                                                                                                                                                                                                       | 100,181 | 15 Mar 2021 |
| #8. #6 AND #7                                                                                                                                                                                                                                                                                                                                                                                                                                                                                                 | 3,077   | 15 Mar 2021 |
| #7. tuberculous                                                                                                                                                                                                                                                                                                                                                                                                                                                                                               | 56,461  | 15 Mar 2021 |
| #6. #4 OR #5                                                                                                                                                                                                                                                                                                                                                                                                                                                                                                  | 67,049  | 15 Mar 2021 |
| #5. 'effusion, pleural':ab,ti OR 'effusions,<br>pleural':ab,ti OR 'pleural effusions':ab,ti                                                                                                                                                                                                                                                                                                                                                                                                                   | 12,780  | 15 Mar 2021 |
| #4. 'pleura effusion'/exp                                                                                                                                                                                                                                                                                                                                                                                                                                                                                     | 65,310  | 15 Mar 2021 |
| #3. #1 OR #2                                                                                                                                                                                                                                                                                                                                                                                                                                                                                                  | 5,579   | 15 Mar 2021 |
| #2. 'effusion, malignant pleural':ab,ti OR<br>'effusions, malignant pleural':ab,ti OR<br>'malignant pleural effusion':ab,ti OR 'malignant<br>pleural effusions':ab,ti OR 'pleural effusions,<br>malignant':ab,ti                                                                                                                                                                                                                                                                                              | 4,672   | 15 Mar 2021 |
| #1. 'malignant pleura effusion'/exp                                                                                                                                                                                                                                                                                                                                                                                                                                                                           | 3,146   | 15 Mar 2021 |
| .....                                                                                                                                                                                                                                                                                                                                                                                                                                                                                                         |         |             |

## 2. NOS quality assessment:

Table S1a. The Newcastle-Ottawa Scale (NOS) quality assessment of the TNF- $\alpha$  included studies in this meta-analysis.

| Study/Year             | Selection                                    |                                               |                                  | Defini<br>tion of<br>contro<br>ls | Compara<br>bility<br>of<br>cases and<br>controls<br>on the<br>basis of<br>the design<br>or analysis | Expos<br>ure<br>Ascertainme<br>nt of<br>exposu<br>re | Same<br>metho<br>d of<br>ascert<br>ainme<br>nt for<br>cases<br>and<br>contro<br>ls | Non<br>-<br>Resp<br>onse<br>Rate | Over<br>all<br>NOS |
|------------------------|----------------------------------------------|-----------------------------------------------|----------------------------------|-----------------------------------|-----------------------------------------------------------------------------------------------------|------------------------------------------------------|------------------------------------------------------------------------------------|----------------------------------|--------------------|
|                        | Is the<br>case<br>definitio<br>n<br>adequate | Repre<br>sentati<br>veness<br>of the<br>cases | Select<br>ion of<br>contro<br>ls |                                   |                                                                                                     |                                                      |                                                                                    |                                  |                    |
| Alemán et al. 2003     | ☆                                            | ☆                                             |                                  | ☆                                 | ☆                                                                                                   | ☆                                                    | ☆                                                                                  |                                  | 6                  |
| Ali et al. 2015        | ☆                                            | ☆                                             |                                  | ☆                                 | ☆☆                                                                                                  | ☆                                                    | ☆                                                                                  |                                  | 7                  |
| Ambade et al. 2011     | ☆                                            |                                               |                                  | ☆                                 | ☆                                                                                                   | ☆                                                    | ☆                                                                                  |                                  | 5                  |
| Atef et al. 2016       | ☆                                            | ☆                                             |                                  | ☆                                 | ☆☆                                                                                                  | ☆                                                    | ☆                                                                                  |                                  | 7                  |
| Budak et al. 2008      | ☆                                            | ☆                                             |                                  | ☆                                 | ☆                                                                                                   | ☆                                                    | ☆                                                                                  |                                  | 6                  |
| Ciledag et al. 2010    | ☆                                            |                                               |                                  | ☆                                 | ☆                                                                                                   | ☆                                                    | ☆                                                                                  |                                  | 5                  |
| Daniil et al. 2007     | ☆                                            | ☆                                             |                                  | ☆                                 | ☆                                                                                                   | ☆                                                    | ☆                                                                                  |                                  | 6                  |
| Gao et al. 2019        | ☆                                            | ☆                                             |                                  | ☆                                 | ☆☆                                                                                                  | ☆                                                    | ☆                                                                                  |                                  | 7                  |
| Hamed et al. 2004      | ☆                                            | ☆                                             |                                  | ☆                                 | ☆                                                                                                   | ☆                                                    | ☆                                                                                  |                                  | 6                  |
| Huang et al. 2008      | ☆                                            | ☆                                             |                                  | ☆                                 | ☆☆                                                                                                  | ☆                                                    | ☆                                                                                  |                                  | 7                  |
| Iglesias et al. 2005   | ☆                                            | ☆                                             |                                  | ☆                                 | ☆☆                                                                                                  | ☆                                                    | ☆                                                                                  |                                  | 7                  |
| Kiropoulos et al. 2007 | ☆                                            | ☆                                             |                                  | ☆                                 | ☆☆                                                                                                  | ☆                                                    | ☆                                                                                  |                                  | 7                  |
| Lee et al. 2010        | ☆                                            | ☆                                             |                                  | ☆                                 | ☆                                                                                                   | ☆                                                    | ☆                                                                                  | ☆                                | 7                  |
| Li et al. 2014         | ☆                                            | ☆                                             |                                  | ☆                                 | ☆☆                                                                                                  | ☆                                                    | ☆                                                                                  |                                  | 7                  |
| Liu et al. 2020        | ☆                                            | ☆                                             | ☆                                | ☆                                 | ☆☆                                                                                                  | ☆                                                    | ☆                                                                                  |                                  | 8                  |

|                    |   |   |  |   |    |   |   |   |   |
|--------------------|---|---|--|---|----|---|---|---|---|
| Momi et al. 2002   | ☆ | ☆ |  | ☆ | ☆☆ | ☆ | ☆ | 7 |   |
| Qian et al. 2012   | ☆ | ☆ |  | ☆ | ☆  | ☆ | ☆ | 6 |   |
| Wang et al. 2014   | ☆ | ☆ |  | ☆ | ☆  | ☆ | ☆ | 6 |   |
| Yamada et al. 2001 |   | ☆ |  | ☆ | ☆  | ☆ | ☆ | ☆ | 6 |

Table S1b. The Newcastle-Ottawa Scale (NOS) quality assessment of the IFN- $\gamma$  included studies in this meta-analysis.

| Study/Year          | Selection                             |                                               |                                  | Defini<br>tion of<br>contro<br>ls | Compara<br>bility<br>of<br>cases and<br>controls<br>on the<br>basis of<br>the design<br>or analysis | Expos<br>ure<br>Ascertainme<br>nt of<br>exposu<br>re | Same<br>metho<br>d of<br>ascert<br>ainme<br>nt for<br>cases<br>and<br>contro<br>ls | Over<br>all<br>NOS |
|---------------------|---------------------------------------|-----------------------------------------------|----------------------------------|-----------------------------------|-----------------------------------------------------------------------------------------------------|------------------------------------------------------|------------------------------------------------------------------------------------|--------------------|
|                     | Is the case<br>definition<br>adequate | Repre<br>sentati<br>veness<br>of the<br>cases | Select<br>ion of<br>contro<br>ls |                                   |                                                                                                     |                                                      |                                                                                    |                    |
| Ali et al. 2015     | ☆                                     | ☆                                             |                                  | ☆                                 | ☆                                                                                                   | ☆                                                    | ☆                                                                                  | 6                  |
| Ambade et al. 2011  | ☆                                     |                                               |                                  | ☆                                 | ☆                                                                                                   | ☆                                                    | ☆                                                                                  | 5                  |
| Budak et al. 2008   |                                       | ☆                                             |                                  | ☆                                 | ☆                                                                                                   | ☆                                                    | ☆                                                                                  | 5                  |
| Chen et al. 2001    | ☆                                     | ☆                                             |                                  | ☆                                 | ☆                                                                                                   | ☆                                                    | ☆                                                                                  | 6                  |
| Cui et al. 2010     | ☆                                     | ☆                                             | ☆                                | ☆                                 | ☆☆                                                                                                  | ☆                                                    | ☆                                                                                  | 8                  |
| Ghayumi et al. 2011 | ☆                                     | ☆                                             |                                  | ☆                                 | ☆☆                                                                                                  | ☆                                                    | ☆                                                                                  | 7                  |
| Ibrahim et al. 2013 | ☆                                     |                                               | ☆                                | ☆                                 | ☆☆                                                                                                  | ☆                                                    | ☆                                                                                  | 7                  |



|                      |   |   |   |   |    |   | contro<br>ls |   |
|----------------------|---|---|---|---|----|---|--------------|---|
| Cui et al.<br>2010   | ☆ | ☆ | ☆ | ☆ | ☆☆ | ☆ | ☆            | 8 |
| Zhang et<br>al. 2020 | ☆ | ☆ |   | ☆ | ☆  | ☆ | ☆            | 6 |
| Shu et al.<br>2015   | ☆ | ☆ |   | ☆ | ☆  | ☆ | ☆            | 6 |

Table S1d. The Newcastle-Ottawa Scale (NOS) quality assessment of the IL-4 included studies in this meta-analysis.

| Study/Year                | Selection                             |                                               |                                  | Defini<br>tion of<br>contro<br>ls | Compara<br>bility<br>of<br>cases and<br>controls<br>on the<br>basis of<br>the design<br>or analysis | Expos<br>ure<br>Ascertainme<br>nt of<br>exposu<br>re | Same<br>metho<br>d of<br>ascert<br>ainme<br>nt for<br>cases<br>and<br>contro<br>ls | Non<br>-<br>Resp<br>onse<br>Rate | Over<br>all<br>NOS |
|---------------------------|---------------------------------------|-----------------------------------------------|----------------------------------|-----------------------------------|-----------------------------------------------------------------------------------------------------|------------------------------------------------------|------------------------------------------------------------------------------------|----------------------------------|--------------------|
|                           | Is the case<br>definition<br>adequate | Repre<br>sentati<br>veness<br>of the<br>cases | Select<br>ion of<br>contro<br>ls |                                   |                                                                                                     |                                                      |                                                                                    |                                  |                    |
| Budak et<br>al. 2008      |                                       | ☆                                             |                                  | ☆                                 | ☆                                                                                                   | ☆                                                    | ☆                                                                                  |                                  | 5                  |
| Chen et<br>al. 2016       | ☆                                     | ☆                                             |                                  | ☆                                 | ☆                                                                                                   | ☆                                                    | ☆                                                                                  | ☆                                | 7                  |
| Cui et al.<br>2010        | ☆                                     | ☆                                             | ☆                                | ☆                                 | ☆☆                                                                                                  | ☆                                                    | ☆                                                                                  |                                  | 8                  |
| Ghayumi<br>et al.<br>2011 | ☆                                     | ☆                                             |                                  | ☆                                 | ☆☆                                                                                                  | ☆                                                    | ☆                                                                                  |                                  | 7                  |
| Okamoto<br>et al.<br>2005 | ☆                                     | ☆                                             |                                  | ☆                                 | ☆                                                                                                   | ☆                                                    | ☆                                                                                  |                                  | 6                  |
| Zhang et<br>al. 2020      | ☆                                     | ☆                                             |                                  | ☆                                 | ☆                                                                                                   | ☆                                                    | ☆                                                                                  |                                  | 6                  |

Table S1e. The Newcastle-Ottawa Scale (NOS) quality assessment of the IL-10 included studies in this meta-analysis.



| Study/Year          | Selection                       |                                 |                        | Definition of controls | Comparability of cases and controls on the basis of the design or analysis | Exposure | Ascertainment of exposure | Same method of ascertainment for cases and controls | Non-Response Rate | Overall NOS |
|---------------------|---------------------------------|---------------------------------|------------------------|------------------------|----------------------------------------------------------------------------|----------|---------------------------|-----------------------------------------------------|-------------------|-------------|
|                     | Is the case definition adequate | Representativeness of the cases | Select ion of controls |                        |                                                                            |          |                           |                                                     |                   |             |
| Budak et al. 2008   |                                 | ☆                               |                        | ☆                      | ☆                                                                          | ☆        | ☆                         |                                                     |                   | 5           |
| Chen et al. 2001    | ☆                               | ☆                               |                        | ☆                      | ☆                                                                          | ☆        | ☆                         |                                                     |                   | 6           |
| Chen et al. 2016    | ☆                               | ☆                               |                        | ☆                      | ☆                                                                          | ☆        | ☆                         | ☆                                                   |                   | 7           |
| Ciledag et al. 2010 | ☆                               |                                 |                        | ☆                      | ☆☆                                                                         | ☆        | ☆                         |                                                     |                   | 6           |
| Ghayumi et al. 2011 | ☆                               | ☆                               |                        | ☆                      | ☆☆                                                                         | ☆        | ☆                         |                                                     |                   | 7           |
| Li et al. 2014      | ☆                               | ☆                               |                        | ☆                      | ☆                                                                          | ☆        | ☆                         |                                                     |                   | 6           |
| Shu et al. 2015     | ☆                               | ☆                               |                        | ☆                      | ☆                                                                          | ☆        | ☆                         |                                                     |                   | 6           |
| Zhang et al. 2020   | ☆                               | ☆                               |                        | ☆                      | ☆                                                                          | ☆        | ☆                         |                                                     |                   | 6           |

Table S1f. The Newcastle-Ottawa Scale (NOS) quality assessment of the IL-6 included studies in this meta-analysis.

| Study/Year | Selection                       |                                 |                        | Definition of controls | Comparability of cases and controls on the basis of | Exposure | Ascertainment of exposure | Same method of ascertainment for | Non-Response Rate | Overall NOS |
|------------|---------------------------------|---------------------------------|------------------------|------------------------|-----------------------------------------------------|----------|---------------------------|----------------------------------|-------------------|-------------|
|            | Is the case definition adequate | Representativeness of the cases | Select ion of controls |                        |                                                     |          |                           |                                  |                   |             |

|                        |   |   |   | the design<br>or analysis |   | cases<br>and<br>contro<br>ls |   |   |
|------------------------|---|---|---|---------------------------|---|------------------------------|---|---|
| Chen et al. 2016       | ☆ | ☆ | ☆ | ☆                         | ☆ | ☆                            | ☆ | 7 |
| Dalil et al. 2021      | ☆ | ☆ | ☆ | ☆                         | ☆ | ☆                            |   | 6 |
| Daniil et al. 2007     | ☆ | ☆ | ☆ | ☆                         | ☆ | ☆                            |   | 6 |
| Ferreiro et al. 2019   | ☆ | ☆ | ☆ | ☆☆                        | ☆ | ☆                            |   | 7 |
| Kiropoulos et al. 2007 | ☆ | ☆ | ☆ | ☆☆                        | ☆ | ☆                            |   | 7 |
| Marie et al. 2013      | ☆ | ☆ | ☆ | ☆☆                        | ☆ | ☆                            |   | 7 |
| Qian et al. 2012       | ☆ | ☆ | ☆ | ☆                         | ☆ | ☆                            |   | 6 |
| Sayed et al. 2015      | ☆ | ☆ | ☆ | ☆                         | ☆ | ☆                            |   | 6 |
| Shu et al. 2015        | ☆ | ☆ | ☆ | ☆                         | ☆ | ☆                            |   | 6 |
| Teixeira et al. 2016   | ☆ | ☆ | ☆ | ☆                         | ☆ | ☆                            |   | 6 |
| Xirouchaki et al. 2002 | ☆ | ☆ | ☆ | ☆☆                        | ☆ | ☆                            |   | 7 |
| Zhang et al. 2020      | ☆ | ☆ | ☆ | ☆                         | ☆ | ☆                            |   | 6 |

### 3. Characteristics of studies included:

Table S2a. Characteristics of included TNF- $\alpha$  studies.

| Study              | Country | Age                | Type of study | Assay | Design       | Etiology         | Histopathology | NOS |
|--------------------|---------|--------------------|---------------|-------|--------------|------------------|----------------|-----|
| Alemán et al. 2003 | Spain   | NS                 | Prospective   | ELISA | Cohort study | MPE: diverse     | NS             | 6   |
| Ali et al. 2015    | Egypt   | MPE: 54.50 ± 10.59 | Prospective   | ELISA | Cohort study | MPE: lung cancer | MPE: diverse   | 7   |

|                        |        |                                            |               |       |                    |                  |              |  |                       |
|------------------------|--------|--------------------------------------------|---------------|-------|--------------------|------------------|--------------|--|-----------------------|
|                        |        |                                            |               |       |                    |                  |              |  | TPE: 36.95<br>± 12.77 |
| Ambade et al. 2011     | India  | NS                                         | Prospective   | ELISA | Cohort study       | MPE: diverse     | NS           |  | 5                     |
| Atef et al. 2016       | Egypt  | MPE: 67.6<br>± 10.4<br>TPE: 50.3<br>± 15.1 | Prospective   | ELISA | Cohort study       | NS               | NS           |  | 7                     |
| Budak et al. 2008      | Turkey | MPE: 61.4<br>± 13.5<br>TPE:42.7<br>± 19.7  | Prospective   | ELISA | Cohort study       | MPE: diverse     | NS           |  | 6                     |
| Ciledag et al. 2010    | Turkey | NS                                         | Prospective   | ELISA | Cohort study       | NS               | NS           |  | 5                     |
| Daniil et al. 2007     | Greece | Mean: 65                                   | Prospective   | ELISA | Cohort study       | MPE: diverse     | NS           |  | 6                     |
| Gao et al. 2019        | China  | 18-72                                      | Prospective   | ELISA | Cohort study       | NS               | NS           |  | 7                     |
| Hamed et al. 2004      | Egypt  | MPE: 34.9<br>± 8.7<br>TPE: 29.5<br>± 7.4   | Prospective   | ELISA | Cohort study       | MPE: diverse     | NS           |  | 6                     |
| Huang et al. 2008      | China  | MPE: 34-78<br>TPE: 17-81                   | Prospective   | ELISA | Cohort study       | MPE: lung cancer | MPE: diverse |  | 7                     |
| Iglesias et al. 2005   | Spain  | 18–94                                      | Retrospective | ELISA | Case-control study | NS               | NS           |  | 7                     |
| Kiropoulos et al. 2007 | Greece | MPE: 70±11<br>TPE: 55±16.5                 | Prospective   | ELISA | Cohort study       | NS               | NS           |  | 7                     |
| Lee et al. 2010        | Korea  | 28-75                                      | Retrospective | ELISA | Case-control study | MPE: lung cancer | NS           |  | 7                     |
| Li et al. 2014         | China  | MPE: 55.5 ± 12.4<br>TPE: 51.3 ± 11.8       | Prospective   | ELISA | Cohort study       | MPE: diverse     | NS           |  | 7                     |
| Liu et al. 2020        | China  | MPE: 60.48 ± 9.20<br>TPE: 57.72            | Prospective   | ELISA | Cohort study       | NS               | NS           |  | 8                     |

|                    |       |                                                  |                   |       |                    |                  |                     |   |
|--------------------|-------|--------------------------------------------------|-------------------|-------|--------------------|------------------|---------------------|---|
| Momi et al. 2002   | Japan | $\pm 15.68$<br>Mean: 63.1<br>$\pm 35.2$          | Prospective       | ELISA | Cohort study       | NS               | NS                  | 7 |
| Qian et al. 2012   | China | <65: 34<br>$\geq 65$ : 45                        | Prospective       | ELISA | Cohort study       | MPE: lung cancer | MPE: adenocarcinoma | 6 |
| Wang et al. 2014   | China | MPE: 55.52 $\pm$ 16.51<br>TPE: 35.46 $\pm$ 18.32 | Retrospective     | ELISA | Case-control study | NS               | NS                  | 6 |
| Yamada et al. 2001 | Japan | MPE: 74<br>TPE: 68                               | Prospective study | ELISA | Cohort study       | MPE: diverse     | NS                  | 6 |

ELISA, enzyme-linked immunosorbent assay; NS, Not specified.

Table S2b. Characteristics of included IFN- $\gamma$  studies.

| Study               | Country | Age                                              | Type of study | Assay | Design             | Etiology         | Histopathology | NOS |
|---------------------|---------|--------------------------------------------------|---------------|-------|--------------------|------------------|----------------|-----|
| Ali et al. 2015     | Egypt   | MPE: 54.50 $\pm$ 10.59<br>TPE: 36.95 $\pm$ 12.77 | Prospective   | ELISA | Cohort study       | MPE: lung cancer | MPE: diverse   | 6   |
| Ambade et al. 2011  | India   | NS                                               | Prospective   | ELISA | Cohort study       | MPE: diverse     | NS             | 5   |
| Budak et al. 2008   | Turkey  | MPE: 61.4 $\pm$ 13.5<br>TPE: 42.7 $\pm$ 19.7     | Prospective   | ELISA | Cohort study       | MPE: diverse     | NS             | 5   |
| Chen et al. 2001    | China   | MPE: 67.9 $\pm$ 11.2<br>TPE: 67.6 $\pm$ 12.2     | Retrospective | ELISA | Case-control study | MPE: lung cancer | MPE: diverse   | 6   |
| Cui et al. 2010     | China   | MPE: 54 $\pm$ 11<br>TPE: 38 $\pm$ 17             | Retrospective | ELISA | Case-control study | MPE: lung cancer | NS             | 8   |
| Ghayumi et al. 2011 | Iran    | MPE: 65.5 $\pm$ 15.1<br>TPE: 64.5                | Prospective   | ELISA | Cohort study       | MPE: lung cancer | MPE: diverse   | 7   |

|                         |                         |                                                    |               |       |                    |                  |                     |   |
|-------------------------|-------------------------|----------------------------------------------------|---------------|-------|--------------------|------------------|---------------------|---|
| Ibrahim et al. 2013     | Egypt                   | $\pm 15.2$<br>MPE: 43 (37–68)<br>TPE: 35.5 (29–53) | Prospective   | ELISA | Cohort study       | MPE: lung cancer | MPE: adenocarcinoma | 7 |
| Krenke et al. 2008      | Poland                  | MPE: 46.7 $\pm$ 20.1<br>TPE: 68.1 $\pm$ 9.8        | Prospective   | ELISA | Cohort study       | NS               | NS                  | 7 |
| Lee et al. 2013         | Korea                   | MPE: 69 $\pm$ 14<br>TPE: 55 $\pm$ 23               | Retrospective | ELISA | Case-control study | MPE: diverse     | MPE: diverse        | 7 |
| Li et al. 2014          | China                   | MPE: 55.5 $\pm$ 12.4<br>TPE: 51.3 $\pm$ 11.8       | Prospective   | ELISA | Cohort study       | MPE: diverse     | NS                  | 6 |
| Marie et al. 2013       | Kingdom of Saudi Arabia | NS                                                 | Prospective   | ELISA | Cohort study       | NS               | NS                  | 7 |
| Okamoto et al. 2005 (1) | Japan                   | MPE: 74 (53–88)<br>TPE: 70 (50–94)                 | Retrospective | ELISA | Case-control study | MPE: lung cancer | NS                  | 6 |
| Okamoto et al. 2005 (2) | Japan                   | MPE: 69 (50–94)<br>TPE: 74 (53–88)                 | Prospective   | ELISA | Cohort study       | MPE: lung cancer | NS                  | 6 |
| Valdés et al. 2009      | Spain                   | MPE: 63.7 $\pm$ 12.8<br>TPE: 39.7 $\pm$ 20         | Prospective   | ELISA | Cohort study       | MPE: diverse     | NS                  | 5 |
| Valdés et al. 2014      | Spain                   | MPE: 67.3 $\pm$ 13.4<br>2. 36.95 $\pm$ 12.78"      | Prospective   | ELISA | Cohort study       | MPE: diverse     | NS                  | 8 |
| Wang et al. 2014        | China                   | MPE: 55.52 $\pm$ 16.51<br>TPE: 35.46 $\pm$ 18.32   | Retrospective | ELISA | Case-control study | NS               | NS                  | 7 |
| Wu et al. 2013          | China                   | MPE: 57.7 $\pm$ 2.09                               | Prospective   | ELISA | Cohort study       | MPE: lung        | MPE: diverse        | 7 |

|                      |        |                                           |               |       |                       |                 |    |  |   |
|----------------------|--------|-------------------------------------------|---------------|-------|-----------------------|-----------------|----|--|---|
|                      |        |                                           |               |       |                       |                 |    |  |   |
|                      |        | TPE: 40.10<br>± 2.40                      |               |       |                       | cancer          |    |  |   |
| Xue et al.<br>2007   | China  | MPE: 51.4<br>± 9.8<br>TPE: 48.5<br>± 10.6 | Retrospective | ELISA | Case-control<br>study | MPE:<br>diverse | NS |  | 6 |
| Yurt et al.<br>2014  | Turkey | MPE: 65<br>(50–68)<br>TPE: 25<br>(20–37)  | Prospective   | ELISA | Cohort<br>study       | NS              | NS |  | 7 |
| Zhang et al.<br>2017 | China  | MPE: 45.8<br>± 2.7<br>TPE: 45.6<br>± 2.5  | Retrospective | ELISA | Case-control<br>study | MPE:<br>diverse | NS |  | 5 |

ELISA, enzyme-linked immunosorbent assay; NS, Not specified.

Table S2c. Characteristics of included IL-2 studies.

| Study                | Country | Age                                      | Type of study | Assay   | Design                | Etiology               | Histopathology | NOS |
|----------------------|---------|------------------------------------------|---------------|---------|-----------------------|------------------------|----------------|-----|
| Cui et al.<br>2010   | China   | MPE: 54 ±<br>11<br>TPE: 38 ±<br>17       | Retrospective | ELISA   | Case-control<br>study | MPE:<br>lung<br>cancer | NS             | 8   |
| Shu et al.<br>2015   | China   | MPE:<br>67.3±14.6<br>TPE:<br>66.5±18.9   | Prospective   | Luminex | Cohort<br>study       | NS                     | NS             | 6   |
| Zhang et al.<br>2020 | China   | MPE: 51<br>(36–80)<br>TPE: 45<br>(21–76) | Retrospective | CBA     | Case-control<br>study | MPE:<br>diverse        | NS             | 6   |

CBA, cytometric bead array; ELISA, enzyme-linked immunosorbent assay; NS, Not specified.

Table S2d. Characteristics of included IL-4 studies.

| Study                | Country | Age                                        | Type of study | Assay | Design          | Etiology        | Histopathology | NOS |
|----------------------|---------|--------------------------------------------|---------------|-------|-----------------|-----------------|----------------|-----|
| Budak et al.<br>2008 | Turkey  | MPE: 61.4<br>± 13.5<br>TPE: 42.7<br>± 19.7 | Prospective   | ELISA | Cohort<br>study | MPE:<br>diverse | NS             | 5   |

|                     |       |                                      |               |       |                    |                  |              |   |
|---------------------|-------|--------------------------------------|---------------|-------|--------------------|------------------|--------------|---|
| Chen et al. 2016    | China | MPE: 67.9±13.1<br>TPE: 63.0±21.9     | Prospective   | CBA   | Cohort study       | NS               | NS           | 7 |
| Cui et al. 2010     | China | MPE: 54 ± 11<br>TPE: 38 ± 17         | Retrospective | ELISA | Case-control study | MPE: lung cancer | NS           | 8 |
| Ghayumi et al. 2011 | Iran  | MPE: 65.5 ± 15.1<br>TPE: 64.5 ± 15.2 | Prospective   | ELISA | Cohort study       | MPE: lung cancer | MPE: diverse | 7 |
| Okamoto et al. 2005 | Japan | MPE: 74 (53–88)<br>TPE: 70 (50–94)   | Retrospective | ELISA | Case-control study | MPE: lung cancer | NS           | 6 |
| Zhang et al. 2020   | China | MPE: 51 (36–80)<br>TPE: 45 (21–76)   | Retrospective | CBA   | Case-control study | MPE: diverse     | NS           | 6 |

CBA, cytometric bead array; ELISA, enzyme-linked immunosorbent assay; NS, Not specified.

Table S2e. Characteristics of included IL-10 studies.

| Study               | Country | Age                                  | Type of study | Assay | Design             | Etiology         | Histopathology | NOS |
|---------------------|---------|--------------------------------------|---------------|-------|--------------------|------------------|----------------|-----|
| Budak et al. 2008   | Turkey  | MPE: 61.4 ± 13.5<br>TPE: 42.7 ± 19.7 | Prospective   | ELISA | Cohort study       | MPE: diverse     | NS             | 5   |
| Chen et al. 2001    | China   | MPE: 67.9 ± 11.2<br>TPE: 67.6 ± 12.2 | Retrospective | ELISA | Case-control study | MPE: lung cancer | MPE: diverse   | 6   |
| Chen et al. 2016    | China   | MPE: 67.9±13.1<br>TPE: 63.0±21.9     | Prospective   | CBA   | Cohort study       | NS               | NS             | 7   |
| Ciledag et al. 2010 | Turkey  | NS                                   | Prospective   | ELISA | Cohort study       | NS               | NS             | 6   |
| Ghayumi et al. 2011 | Iran    | MPE: 65.5 ± 15.1<br>TPE: 64.5        | Prospective   | ELISA | Cohort study       | MPE: lung cancer | MPE: diverse   | 7   |

|                   |       |                                                |               |         |                    |              |    |   |
|-------------------|-------|------------------------------------------------|---------------|---------|--------------------|--------------|----|---|
| Li et al. 2014    | China | ± 15.2<br>MPE: 55.5 ± 12.4<br>TPE: 51.3 ± 11.8 | Prospective   | ELISA   | Cohort study       | MPE: diverse | NS | 6 |
| Shu et al. 2015   | China | MPE: 67.3 ± 14.6<br>TPE: 66.5 ± 18.9           | Prospective   | Luminox | Cohort study       | NS           | NS | 6 |
| Zhang et al. 2020 | China | MPE: 51 (36–80)<br>TPE: 45 (21–76)             | Retrospective | CBA     | Case-control study | MPE: diverse | NS | 6 |

CBA, cytometric bead array; ELISA, enzyme-linked immunosorbent assay; NS, Not specified.

Table S2f. Characteristics of included IL-6 studies.

| Study                  | Country                 | Age                                    | Type of study | Assay | Design       | Etiology     | Histopathology | NOS |
|------------------------|-------------------------|----------------------------------------|---------------|-------|--------------|--------------|----------------|-----|
| Chen et al. 2016       | China                   | MPE: 67.9 ± 13.1<br>TPE: 63.0 ± 21.9   | Prospective   | CBA   | Cohort study | NS           | NS             | 7   |
| Dalil et al. 2021      | Iran                    | MPE: 59.5 ± 2.8<br>TPE: 52.3 ± 3.9     | Prospective   | ELISA | Cohort study | NS           | MPE: diverse   | 6   |
| Daniil et al. 2007     | Greece                  | Mean: 65                               | Prospective   | ELISA | Cohort study | MPE: diverse | NS             | 6   |
| Ferreiro et al. 2019   | Spain                   | MPE: 72 (62-80)<br>TPE: 34 (28.3-58.5) | Prospective   | CLEIA | Cohort study | MPE: diverse | NS             | 7   |
| Kiropoulos et al. 2007 | Greece                  | MPE: 70 ± 11<br>TPE: 55 ± 16.5         | Prospective   | ELISA | Cohort study | NS           | NS             | 7   |
| Marie et al. 2013      | Kingdom of Saudi Arabia | NS                                     | Prospective   | ELISA | Cohort study | NS           | NS             | 7   |
| Qian et al. 2012       | China                   | <65: 34<br>≥65: 45                     | Prospective   | ELISA | Cohort study | MPE: lung    | MPE: adenoca   | 6   |



|                        |        |                                    |               |         |                    |                        |                               |   |
|------------------------|--------|------------------------------------|---------------|---------|--------------------|------------------------|-------------------------------|---|
| Sayed et al. 2015      | Egypt  | MPE: 65 ± 9.8<br>TPE: 53.1 ± 6.94  | Prospective   | ELISA   | Cohort study       | cancer<br>MPE: diverse | rcinoma<br>adenoca<br>rcinoma | 6 |
| Shu et al. 2015        | China  | MPE: 67.3±14.6<br>TPE: 66.5±18.9   | Prospective   | Luminox | Cohort study       | NS                     | NS                            | 6 |
| Teixeira et al. 2016   | Brazil | MPE: 62 (21–83)<br>TPE: 35 (16–81) | Prospective   | ELISA   | Cohort study       | MPE: diverse           | NS                            | 6 |
| Xirouchaki et al. 2002 | Greece | 61 ± 14                            | Prospective   | RIA     | Cohort study       | NS                     | NS                            | 7 |
| Zhang et al. 2020      | China  | MPE: 51 (36–80)<br>TPE: 45 (21–76) | Retrospective | CBA     | Case-control study | MPE: diverse           | NS                            | 6 |

CBA, cytometric bead array; CLEIA, chemiluminescent enzyme immunoassay; ELISA, enzyme-linked immunosorbent assay; NS, not specified; RIA, radioimmunoassay.

#### 4. Publication bias:

Figure S3a. A. Funnel plots for TNF- $\alpha$ .

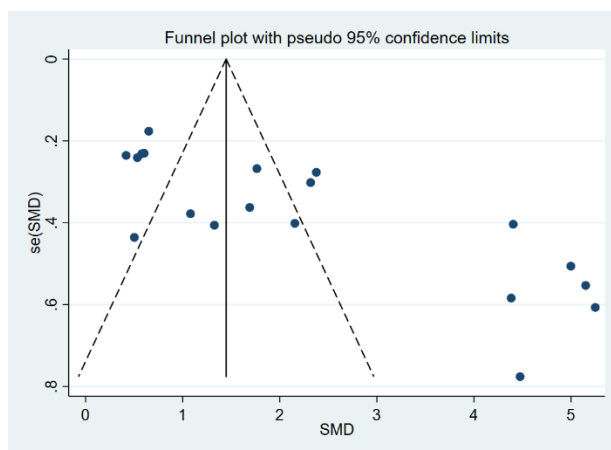

Funnel plot and Begg's test of effect sizes for publication bias.

Begg's Test

adj. Kendall's Score (P-Q) = 85  
 Std. Dev. of Score = 28.58  
 Number of Studies = 19  
 z = 2.97  
 Pr > |z| = 0.003

$$z = 2.94 \text{ (continuity corrected)}$$

$$\text{Pr} > |z| = 0.003 \text{ (continuity corrected)}$$

SMD, standardized mean difference; SE, standard error; Std\_Dev, standard deviation.

Figure S3b. Funnel plots with trim and fill method.

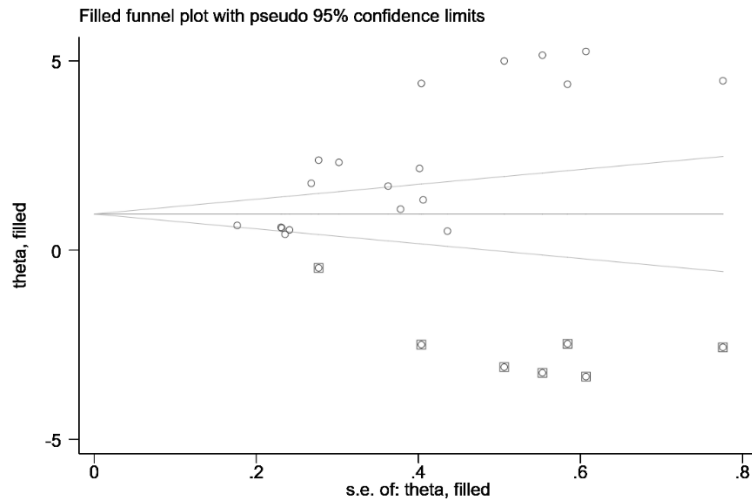

Funnel plot for TNF- $\alpha$ , adjusted with trim and fill method. Circles stand for included studies; diamonds stand for presumed missing studies.

Figure S3c. A. Funnel plots for IFN- $\gamma$ .

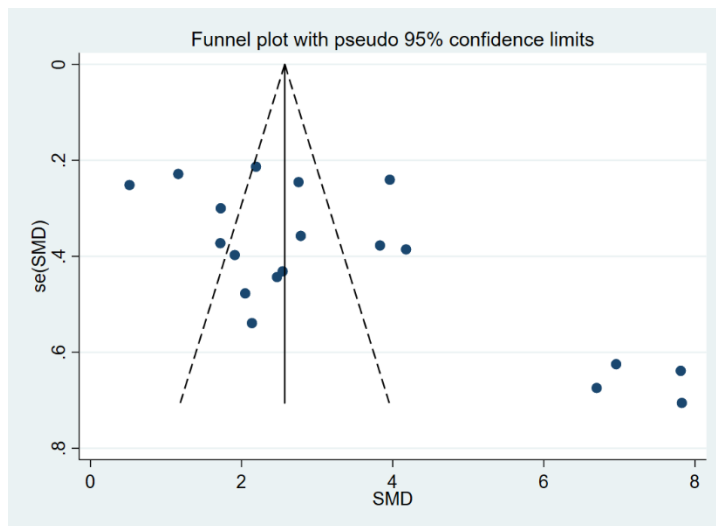

Begg's Test

$$\text{adj. Kendall's Score (P-Q)} = 71$$

$$\text{Std. Dev. of Score} = 28.58$$

$$\text{Number of Studies} = 19$$

$$z = 2.48$$

$\Pr > |z| = 0.013$   
 $z = 2.45$  (continuity corrected)  
 $\Pr > |z| = 0.014$  (continuity corrected)

Figure S3d. Funnel plots with trim and fill method.

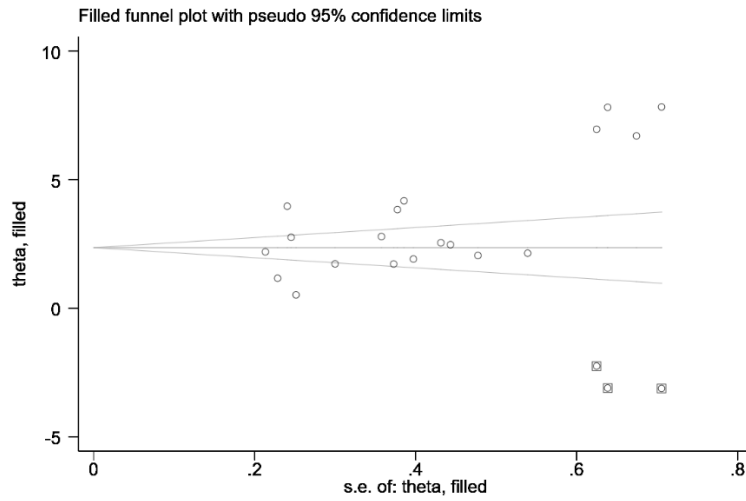

Figure S3e. Funnel plots for IL-6.

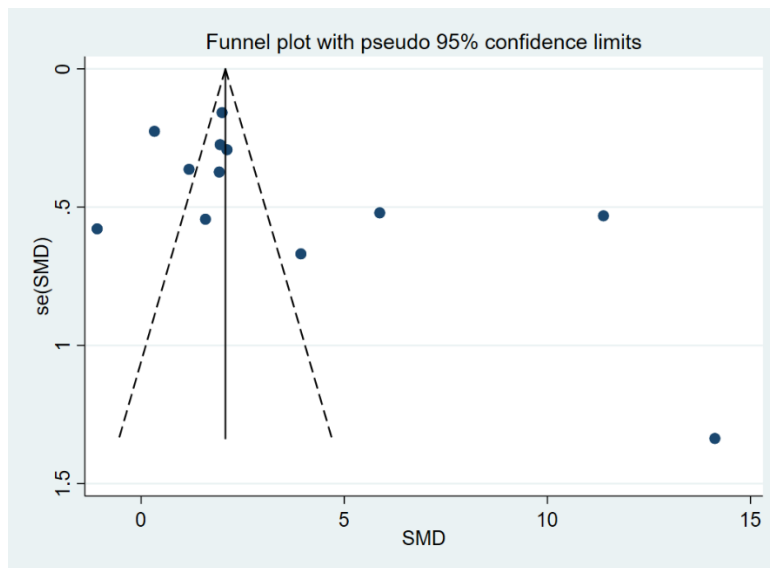

Begg's Test

adj. Kendall's Score (P-Q) = 22  
 Std. Dev. of Score = 14.58  
 Number of Studies = 12  
 $z = 1.51$   
 $\Pr > |z| = 0.131$   
 $z = 1.44$  (continuity corrected)  
 $\Pr > |z| = 0.150$  (continuity corrected)
