# Supplementary material for: A meta-analysis of Th1 and Th2 cytokine profiles differentiating tuberculous from malignant pleural effusion
Source: PubMed Central journal article supplement (PMC8854582; doi:10.1038/s41598-022-06685-8), 2022-02-17
Supplement: 41598_2022_6685_MOESM3_ESM.pdf [file 41598_2022_6685_MOESM3_ESM.pdf]

Table S1. Stratified analysis of pooled SMD for TNF- $\alpha$ .

| Stratified analysis    | Pooled SMD (95% CI) | Heterogeneity    | Meta regression (p-value) |
|------------------------|---------------------|------------------|---------------------------|
| <b>Country</b>         |                     |                  | 0.325                     |
| Asian                  | 1.49 (0.85-2.13)    | 94%, $p < 0.001$ |                           |
| Non-Asian              | 2.14 (1.47-2.82)    | 71%, $p < 0.01$  |                           |
| <b>Study design</b>    |                     |                  | 0.500                     |
| Cohort study           | 1.58 (1.09, 2.08)   | 89%, $p < 0.001$ |                           |
| Case-control study     | 2.43 (-1.33, 6.19)  | 98%, $p < 0.001$ |                           |
| <b>Etiology</b>        |                     |                  | 0.779                     |
| Lung cancer            | 1.43 (0.46, 2.41)   | 88%, $p < 0.001$ |                           |
| Diverse                | 1.70 (0.73, 2.67)   | 92%, $p < 0.001$ |                           |
| <b>Publishing year</b> |                     |                  | 0.462                     |
| $\leq 2010$            | 1.43 (0.76, 2.09)   | 90%, $p < 0.001$ |                           |
| $> 2010$               | 1.99 (1.11, 2.87)   | 94%, $p < 0.001$ |                           |
| <b>Quality score</b>   |                     |                  | 0.699                     |
| $\leq 6$               | 1.88 (0.93, 2.82)   | 93%, $p < 0.001$ |                           |
| $> 6$                  | 1.52 (0.87, 2.17)   | 91%, $p < 0.001$ |                           |

CI, Confidence Intervals; NA: not available.

Table S2. Stratified analysis of pooled SMD for IFN- $\gamma$ .

| Stratified analysis    | Pooled SMD (95% CI) | Heterogeneity    | Meta regression (p-value) |
|------------------------|---------------------|------------------|---------------------------|
| <b>Country</b>         |                     |                  | 0.669                     |
| Asian                  | 3.17 (2.30, 4.04)   | 96%, $p < 0.001$ |                           |
| Non-Asian              | 3.67 (2.49, 4.85)   | 92%, $p < 0.001$ |                           |
| <b>Study design</b>    |                     |                  | 0.834                     |
| Cohort study           | 3.38 (2.47, 4.29)   | 95%, $p < 0.001$ |                           |
| Case-control study     | 3.16 (1.77, 4.54)   | 97%, $p < 0.001$ |                           |
| <b>Etiology</b>        |                     |                  | 0.829                     |
| Lung cancer            | 3.11 (1.84, 4.39)   | 96%, $p < 0.001$ |                           |
| Diverse                | 3.39 (2.24, 4.53)   | 96%, $p < 0.001$ |                           |
| <b>Publishing year</b> |                     |                  | 0.743                     |
| $\leq 2010$            | 3.12 (1.98, 4.26)   | 95%, $p < 0.001$ |                           |
| $> 2010$               | 3.45 (2.43, 4.47)   | 96%, $p < 0.001$ |                           |
| <b>Quality score</b>   |                     |                  | 0.502                     |
| $\leq 6$               | 2.94 (2.01, 3.88)   | 93%, $p < 0.001$ |                           |
| $> 6$                  | 3.65 (2.49, 4.82)   | 97%, $p < 0.001$ |                           |

CI, Confidence Intervals.

Table S3. Stratified analysis of pooled SMD for IL-6.

| <b>Stratified analysis</b> | <b>Pooled SMD (95% CI)</b> | <b>Heterogeneity</b> | <b>Meta regression (p-value)</b> |
|----------------------------|----------------------------|----------------------|----------------------------------|
| <b>Assay</b>               |                            |                      | 0.941                            |
| ELISA                      | 3.28 (1.69-4.87)           | 96%, $p < 0.001$     |                                  |
| Others                     | 3.78 (1.07-6.49)           | 99%, $p < 0.001$     |                                  |
| <b>Country</b>             |                            |                      | 0.823                            |
| Asian                      | 2.66 (1.43-3.89)           | 96%, $p < 0.001$     |                                  |
| Non-Asian                  | 3.99 (0.97-7.01)           | 99%, $p < 0.001$     |                                  |
| <b>Study design</b>        |                            |                      | 0.708                            |
| Cohort study               | 3.73 (2.01-5.46)           | 98%, $p < 0.001$     |                                  |
| Case-control study         | 1.99 (1.68-2.30)           | NA                   |                                  |
| <b>Etiology</b>            |                            |                      | 0.713                            |
| Lung cancer                | 1.93 (1.39-2.47)           | NA                   |                                  |
| Diverse                    | 4.00 (0.82-7.18)           | 99%, $p < 0.001$     |                                  |
| <b>Publishing year</b>     |                            |                      | 0.659                            |
| ≤2010                      | 2.42 (1.56-3.28)           | 70%, $p = 0.04$      |                                  |
| >2010                      | 3.90 (2.09-5.72)           | 98%, $p < 0.001$     |                                  |
| <b>Quality score</b>       |                            |                      | 0.845                            |
| ≤6                         | 3.04 (1.64-4.45)           | 97%, $p < 0.001$     |                                  |
| >6                         | 3.98 (0.68-7.28)           | 99%, $p < 0.001$     |                                  |

CI, Confidence Intervals; ELISA, enzyme-linked immunosorbent assay; NA: not available.
